# Supplementary figures and images for: Taxonomic Reassessment of Freshwater Mussels from the Western Balkans Reveals an Overlooked but Critical Refugium and Defines Conservation Priorities
Source: MDPI journal article supplement (doi:10.3390/d14110935), 2022-10-31

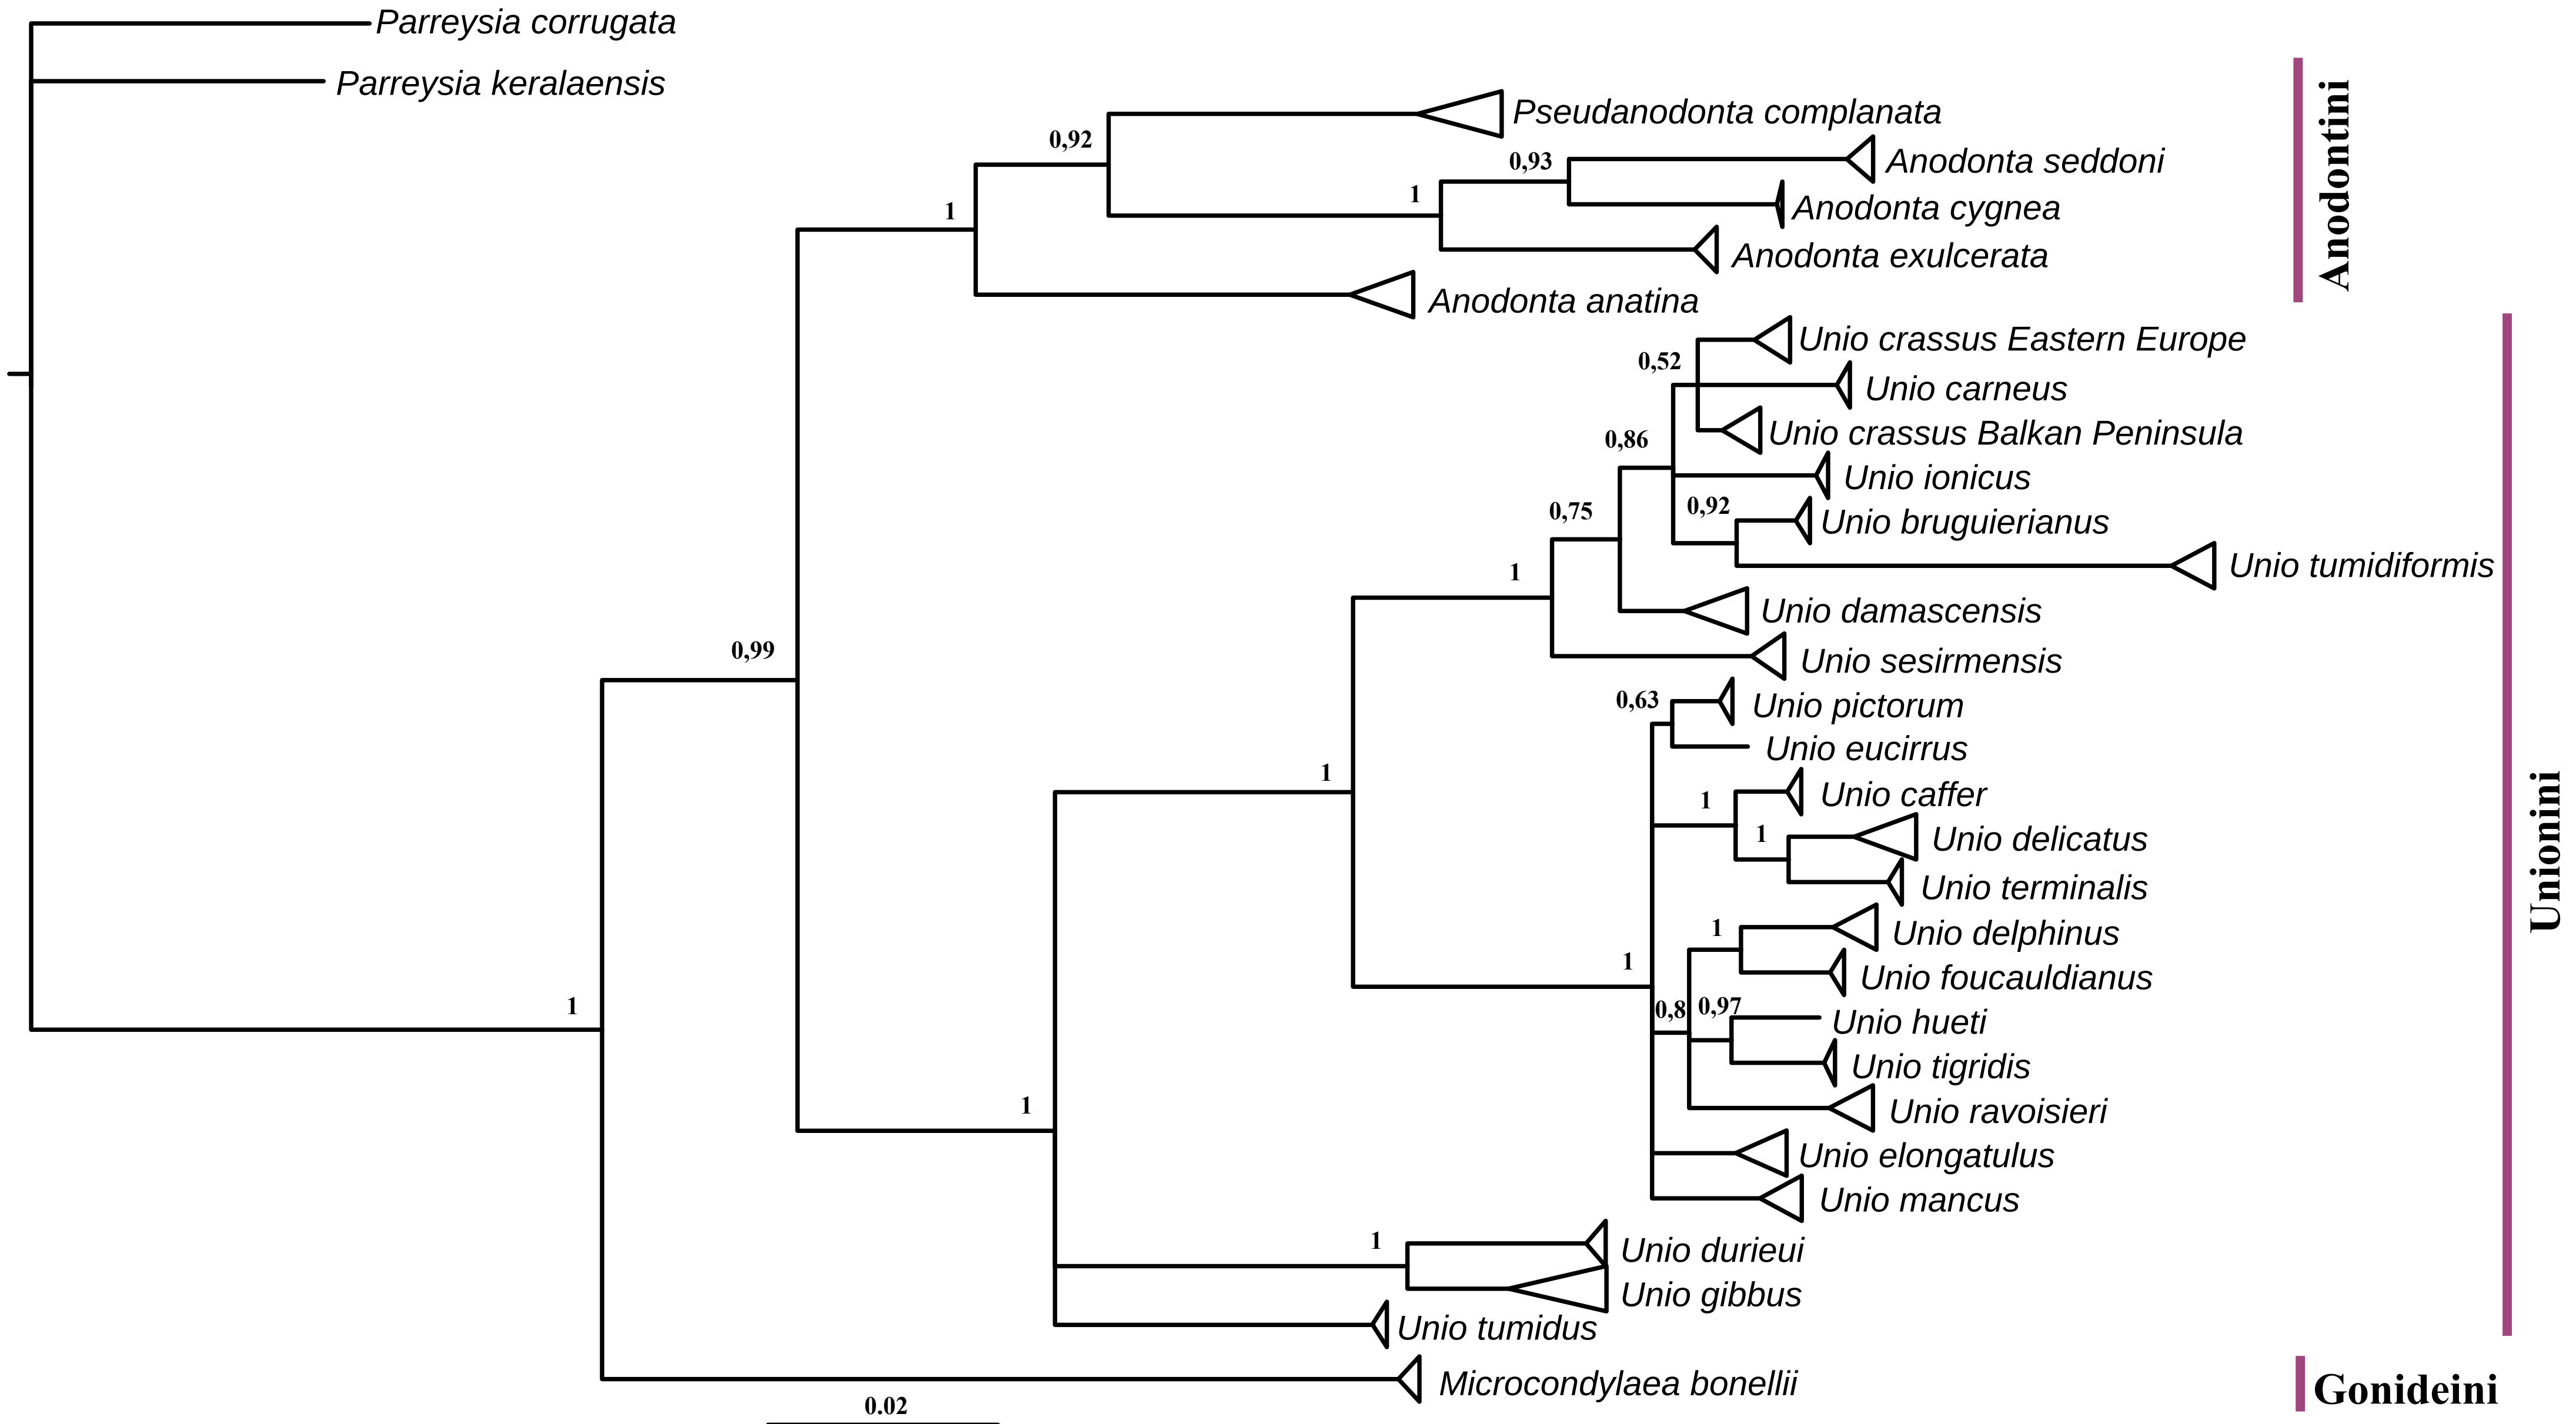

Supplement: s1 [file s1]
